# Supplementary material for: Aggregation enhanced pure violet emission of a spiral meta-polyfluorene by supramolecular control of excimer formation
Source: Royal Society of Chemistry journal article supplement (doi:10.1039/c5tc00206k), 2015-01-01
Supplement: c5tc00206k1.pdf [file c5tc00206k1.pdf]

Supporting information for:

## **Aggregation Enhanced Pure Violet Emission of a Spiral *Meta*-Polyfluoreneby Supramolecularcontrol of Excimer Formation**

LuyangDu<sup>a</sup>, Yueqi Mo<sup>a</sup>, LinlinLiu<sup>a\*</sup>, YuyuPan<sup>b</sup>, DehuaHu<sup>a</sup>, ZengqiXie<sup>a</sup>, Bing Yang<sup>b</sup>,

YuguangMa<sup>a\*</sup>

<sup>a</sup>Institute of Polymer Optoelectronic Materials and Devices, State Key Laboratory of  
Luminescent Materials and Devices, South China University of Technology, Guangzhou  
510640, China.

<sup>b</sup>State Key Laboratory of Supramolecular Structure and Materials, Jilin University,  
Changchun, 130012, China.

### **Table of Contents:**

|                                                            |    |
|------------------------------------------------------------|----|
| 1. Synthesis and characterization of PsF36.....            | S2 |
| 2. <sup>1</sup> H NMR spectrum of PsF36.....               | S3 |
| 3. Fluorescence spectra of PsF27 in mixture solvent.....   | S4 |
| 4. Fluorescence spectra of PsF36 in mixture solvent.....   | S5 |
| 5. The absorbance at 270 nm and unaggregated fraction..... | S6 |

### 1.Synthesis and characterization of PsF36

PsF36 was prepared via a typical Suzuki-Miyaura reaction.<sup>1</sup> Under an argon atmosphere, 3,6-dibromo-2'-(3,7-dimethyloctyloxy)-9,9'-spirobifluorene (0.1575 g, 0.25 mmol), 2,7-Bis(4,4,5,5-tetramethyl[1.3.2]dioxaborolan-2-yl)-2'-(3,7-dimethyloctyloxy)-9,9'-spirobifluorene (0.181 g, 0.25 mmol), tetrabutylammonium hydroxide (25% aqueous solution, 1.1 mL, 1.8 mmol), Pd(OAc)<sub>2</sub> (0.5 mg, 0.0022 mmol) and tri(o-tolyl)phosphine (3.25 mg, 0.0106 mmol) were dissolved in a mixture of toluene (0.25 mL) and dioxane (0.05 mL) and heated to 110 °C. After 24 hr, the sticky solution was diluted with 0.5 mL of toluene and 0.1 mL of dioxane. Another two portions of toluene/dioxane (0.5 mL/0.1 mL) were added after 48 hr and 72 hr successively. Pd(OAc)<sub>2</sub> (0.5 mg, 0.0022 mmol) and tri(o-tolyl)phosphine (3.25 mg, 0.0106 mmol) together with 4-methylphenyl boronic acid (30 mg, 22 mmol) was added and the mixture was heated for another 12 hr. Finally, 4-bromotoluene (0.2 mL) was added and heated overnight. After cooling down, the mixture was poured into the mixture of toluene (5 mL) and HCl aqueous solution (10 wt%, 5 mL) and vigorously stirred for 4 hr. The organic phase was washed with deionized water several times, concentrated to 3 mL and poured into 30 mL of methanol. The precipitate was filtered and purified by column chromatography (silica gel, toluene as an eluent). The solvent was removed under reduced pressure, and the crude polymer was dissolved in 3 mL of toluene and reprecipitated twice from 30 mL of methanol to afford 99 mg of PsF36 as a white powder. (yield 42.5 %). <sup>1</sup>H NMR (300MHz, CDCl<sub>3</sub>, ppm): 8.53(s), 8.13(d), 7.75(s, 2H), 7.41(d, 2H), 7.33(d, 1H), 7.00(s, 1H), 6.90(d, 1H), 6.81(s, 2H), 6.72(d, 1H), 6.32(dd, 1H), 3.79(s, 2H), 1.60(d, 2H), 1.42(d, 2H), 1.22(d, 3H), 1.04(s, 3H), 0.79(dt, 9H). GPC: Mn 14,000, Mw 26,500, PDI 1.9.

## 2. $^1\text{H}$ NMR spectrum of PsF36

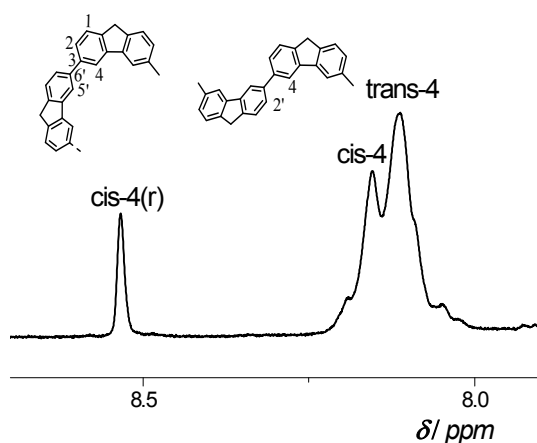

Fig S1  $^1\text{H}$  NMR spectrum of PsF36.

The weak signal around 8.53 ppm should be assigned to 4-proton in low polymerized macrocyclic PsF36 with all *cis*-conformation. The two main peaks at 8.15 and 8.11 ppm should be corresponding to the *cis*- and *trans*- conformation in linear polymer chain or high polymerized macrocycles, even though it is difficult to determine which is which experimentally. We tend to assign the one at 8.15 ppm to *cis*-conformation and that at 8.11 ppm to *trans*-conformation, because the torsion angle of *cis*-conformation is 2 degree smaller than that of *trans*-, which would induce a little stronger interaction between 4, 5' protons in *cis*-conformation than the interaction between 4, 2' protons in *trans*-conformation. Based on this hypothesis, the ratio of *cis*- and *trans*-conformation would be 33% and 67% by integral area accounts.

### 3. Fluorescence spectra of PsF27 in mixture solvent

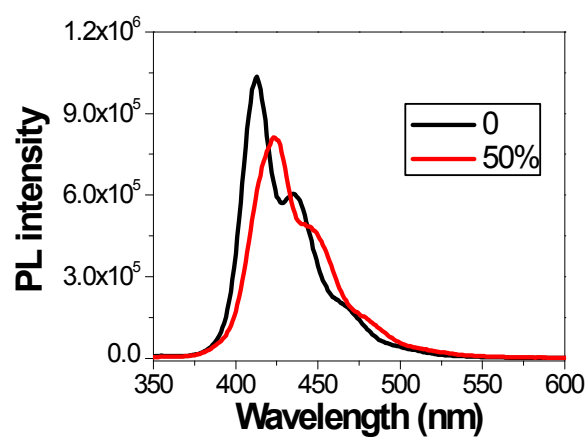

Fig S2 Fluorescence spectra of PsF27 in THF:H<sub>2</sub>O ( $1.5 \times 10^{-5}$ M) as a function of H<sub>2</sub>O ratio.

The emission spectrum of PsF27 in THF/H<sub>2</sub>O mixture solvent has a 10 nm redshift compared with that in dilute good solvent. That is because of an extended chain conjugation length as in the  $\beta$ -phase of *para*-linked polyfluorenes.

#### 4. Fluorescence spectra of PsF36 in mixture solvent

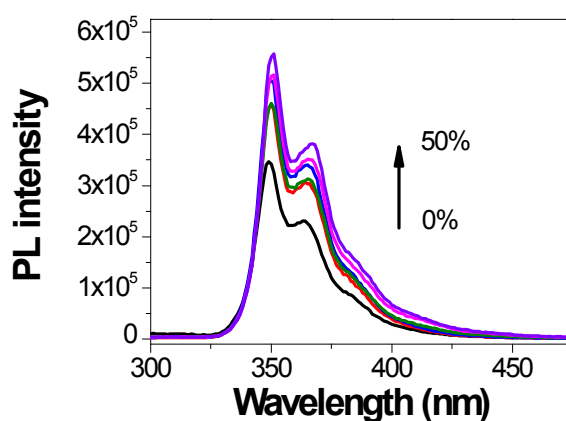

Fig S3 Fluorescence spectra of PsF36 in THF:H<sub>2</sub>O ( $1.5 \times 10^{-5}$  M) as a function of H<sub>2</sub>O ratio.

When the H<sub>2</sub>O ratio is 50%, the mixture solvent is transparent enough to obtain creditable fluorescence spectra. But at this concentration of  $7.5 \times 10^{-5}$  M, PsF36 aggregate become opaque when the H<sub>2</sub>O ratio is higher than 25% which indicates the formation of big aggregate and the creditable PL intensity cannot be recorded. Also the concentration of  $7.5 \times 10^{-5}$  M is too high to obtain absorption spectra.

### 5. The absorbance at 270 nm and unaggregated fraction

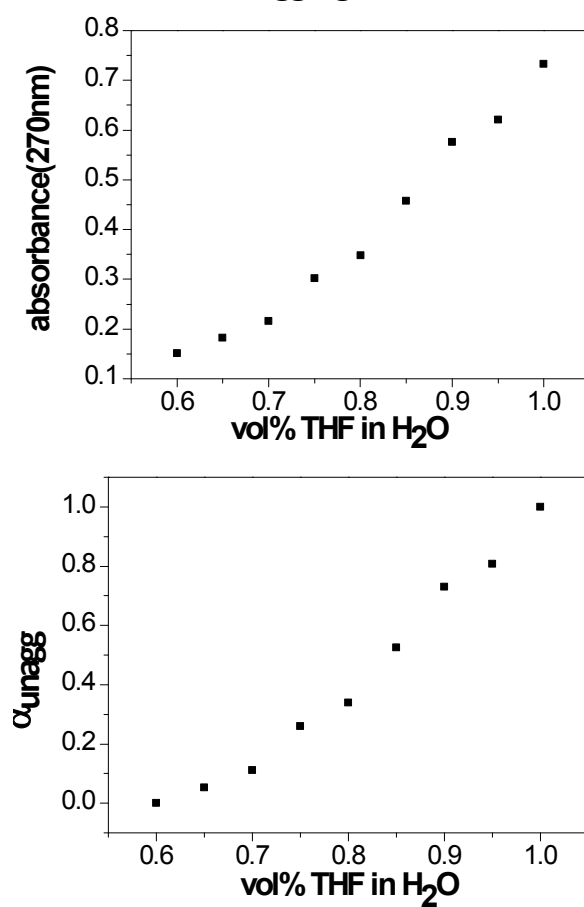

Fig S4. The absorbance at 270 nm, unaggregated fraction ( $\alpha_{unagg}$ ) respectively as a function of THF ratio.

### Reference

- (1) Brookins, R. N.; Schanze, K. S.; Reynolds, J. R. Base-Free Suzuki Polymerization for the Synthesis of Polyfluorenes Functionalized with Carboxylic Acids *Macromolecules*, **2007**, *40*, 3524-3526.
